# Supplementary material
Source: Royal Society of Chemistry journal article supplement (doi:10.1039/d6py00327c)
Supplement: d6py00327c1.pdf [file d6py00327c1.pdf]

## Supporting Information

### **Fabrication of Dynamically Cross-Linked Polyethylene with Boronate Ester Bonds via Thiol-Ene Click Reaction: Thermal Stability and Reprocessability**

Tianhao Nan<sup>a,b</sup>, Yuxin Liang<sup>a,b</sup>, Guangbi Gong<sup>c</sup>, Bo Liu<sup>a,b</sup> and Dongmei Cui<sup>a,b\*</sup>

<sup>a</sup> School of Applied Chemistry and Engineering, University of Science and Technology of China, Hefei, 230026, China.

<sup>b</sup> State Key Laboratory of Polymer Science and Technology, Changchun Institute of Applied Chemistry, Chinese Academy of Sciences, Changchun 130022, China.

<sup>c</sup> PetroChina (Shanghai) Advanced Materials Research Institute Co. Ltd., Shanghai, 201306, China

\*Corresponding author. Email: [dmcui@ciac.ac.cn](mailto:dmcui@ciac.ac.cn)

#### **The PDF file includes:**

Figs. S1 to S11

## Supporting Figures

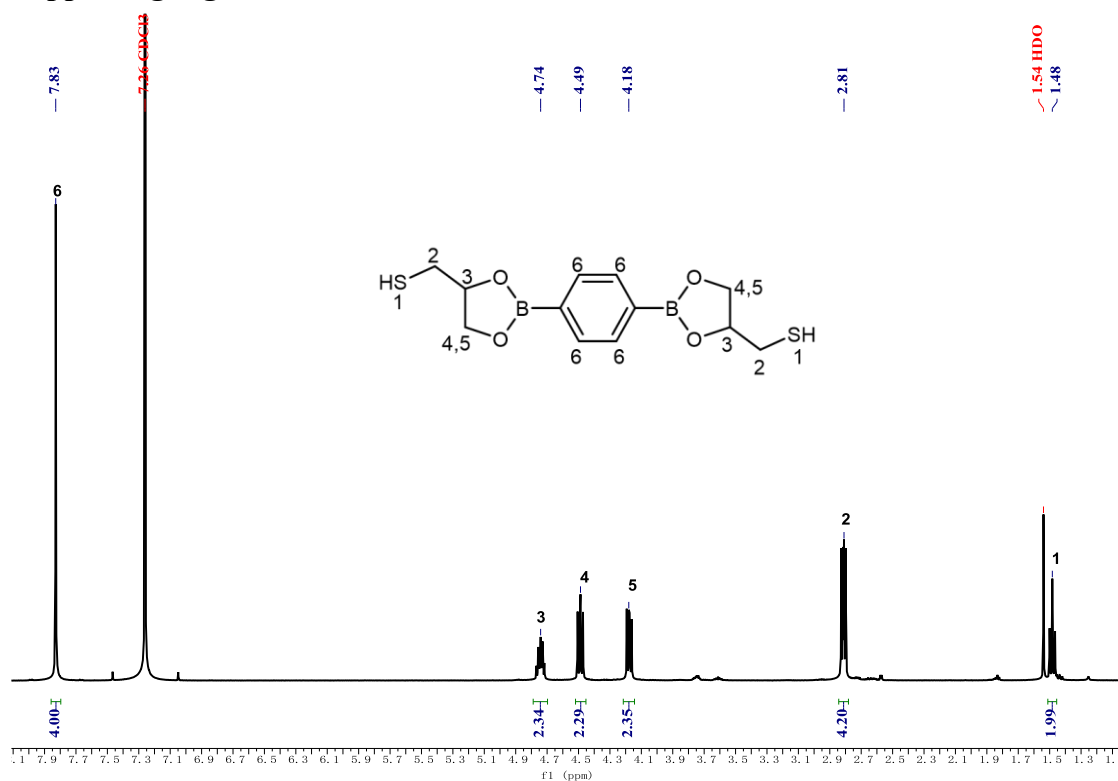

**Fig. S1** <sup>1</sup>H NMR spectrum of BDB in CDCl<sub>3</sub> at 25 °C.

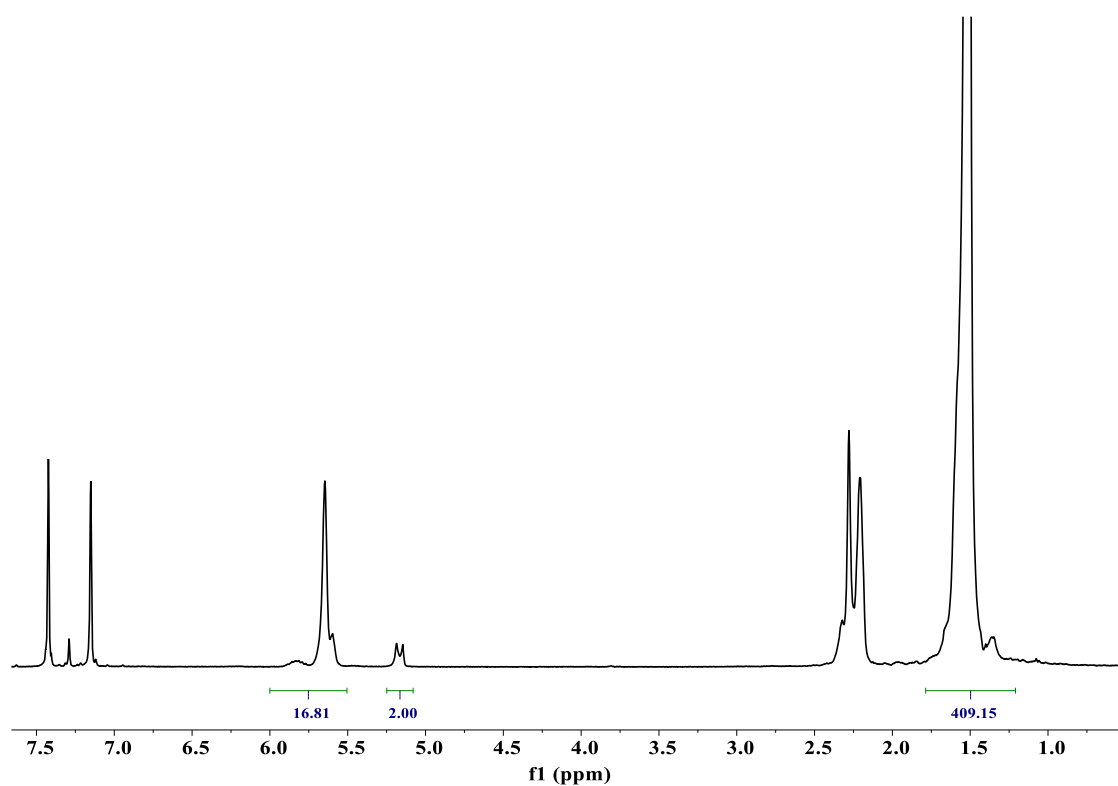

**Fig. S2** <sup>1</sup>H NMR spectrum of E-BD copolymer determined in C<sub>6</sub>D<sub>4</sub>Cl<sub>2</sub> at 110 °C. The ethylene content was calculated according to the following equation:  $f_E = [I_{(1.21-1.79)} - 1.5 * I_{5.20}] / [I_{(1.21-1.79)} + I_{(5.50-6.00)} - 0.5 * I_{5.20}] * 100\% = (409.15 - 1.5 * 2) / (409.15 + 2 * 16.81 - 0.5 * 2) = 91.94\%$ .

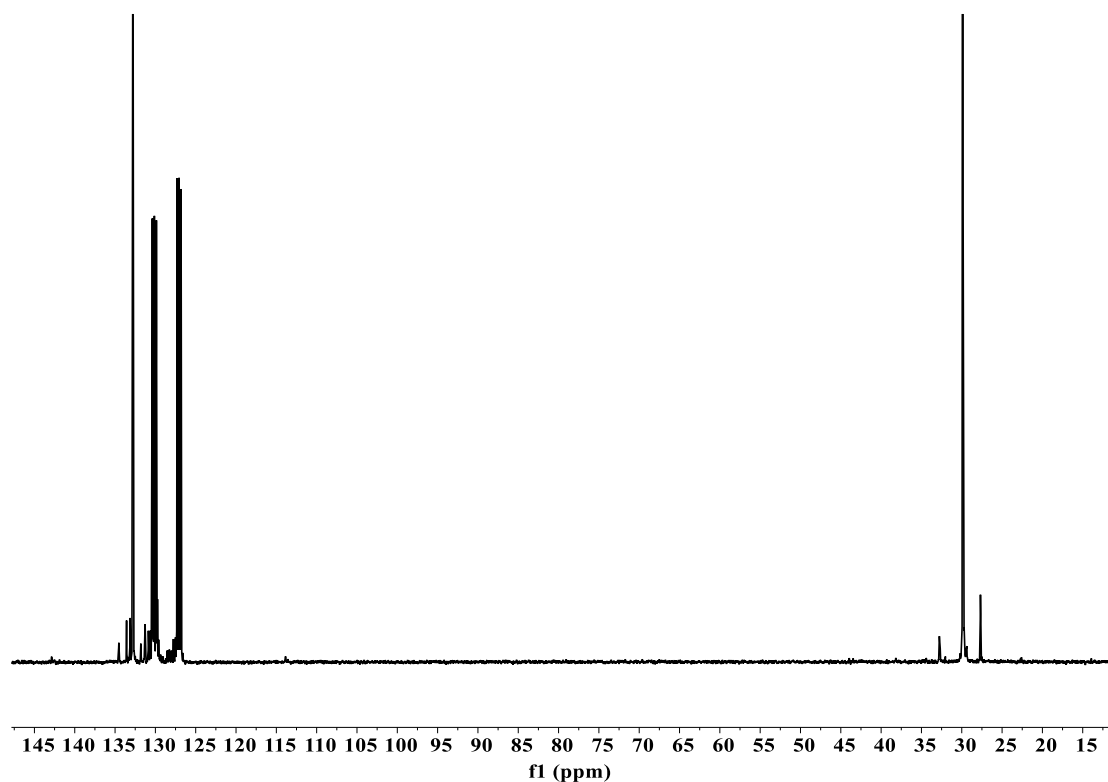

**Fig. S3**  $^{13}\text{C}$  NMR spectrum of **E-BD** copolymer determined in  $\text{C}_6\text{D}_4\text{Cl}_2$  at  $110^\circ\text{C}$ .

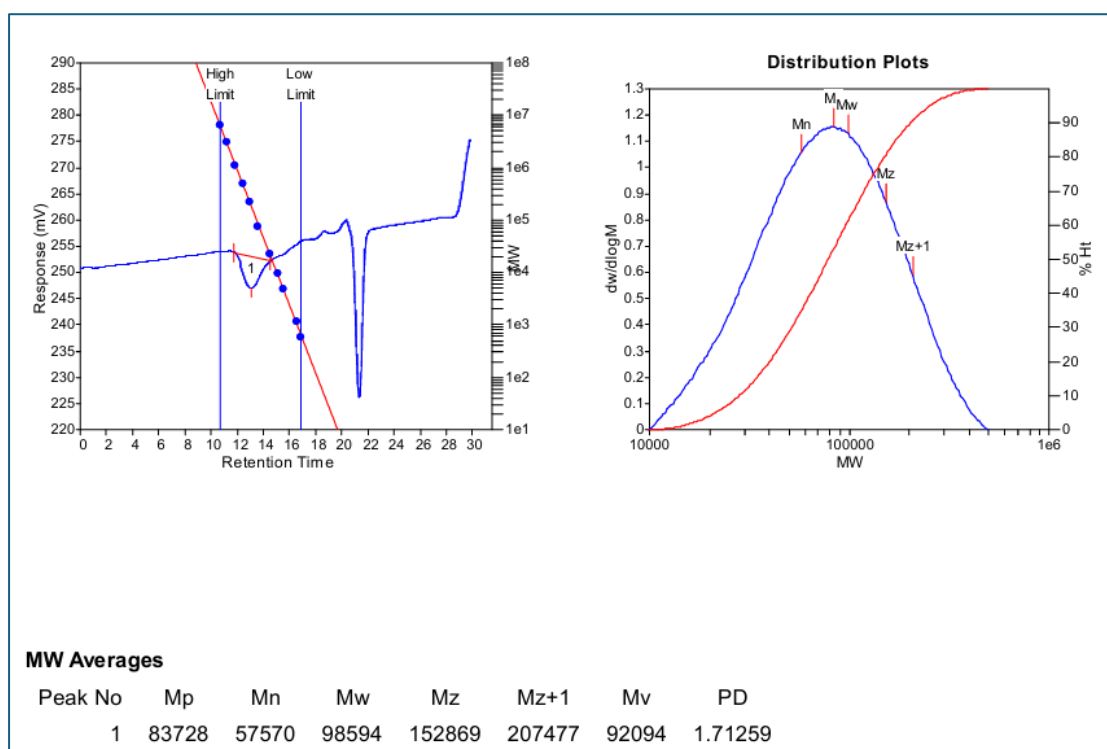

**Fig. S4** GPC curve of **E-BD** copolymer.

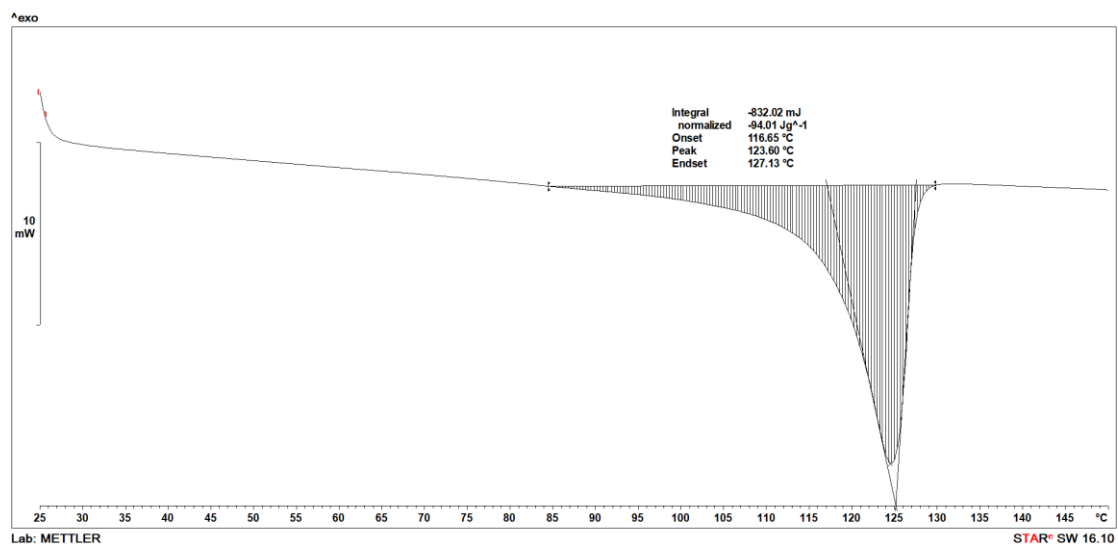

**Fig. S5** DSC curve of **E-BD** copolymer.

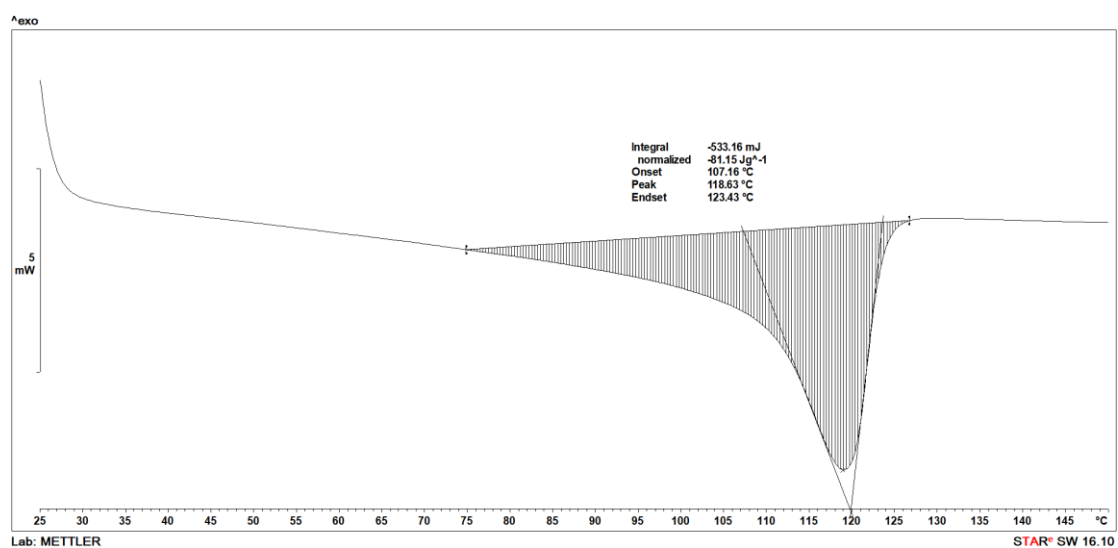

**Fig. S6** DSC curve of **XEBD1**.

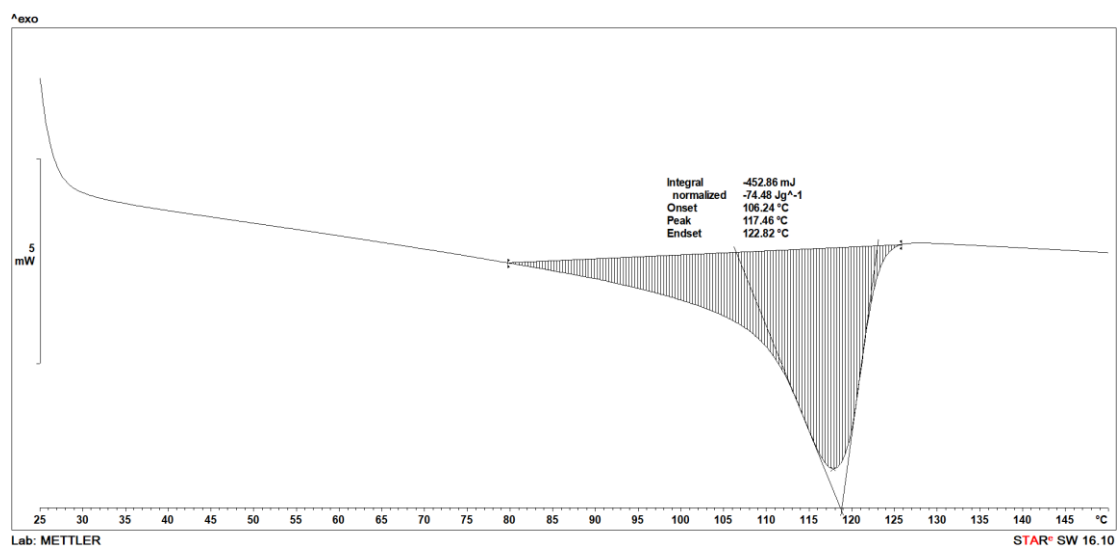

**Fig. S7** DSC curve of **XEBD2**.

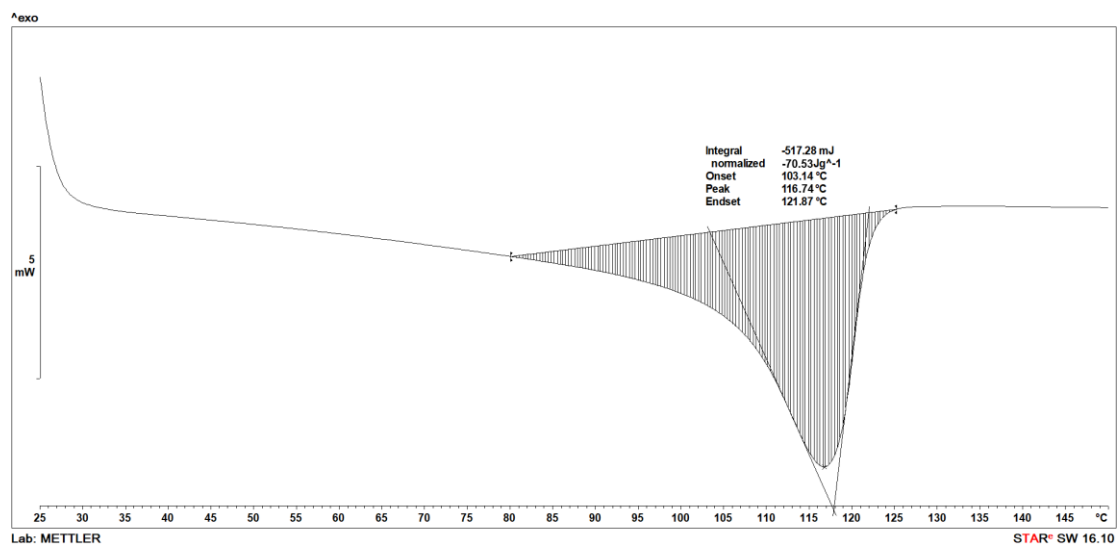

**Fig. S8** DSC curve of XEBD3.

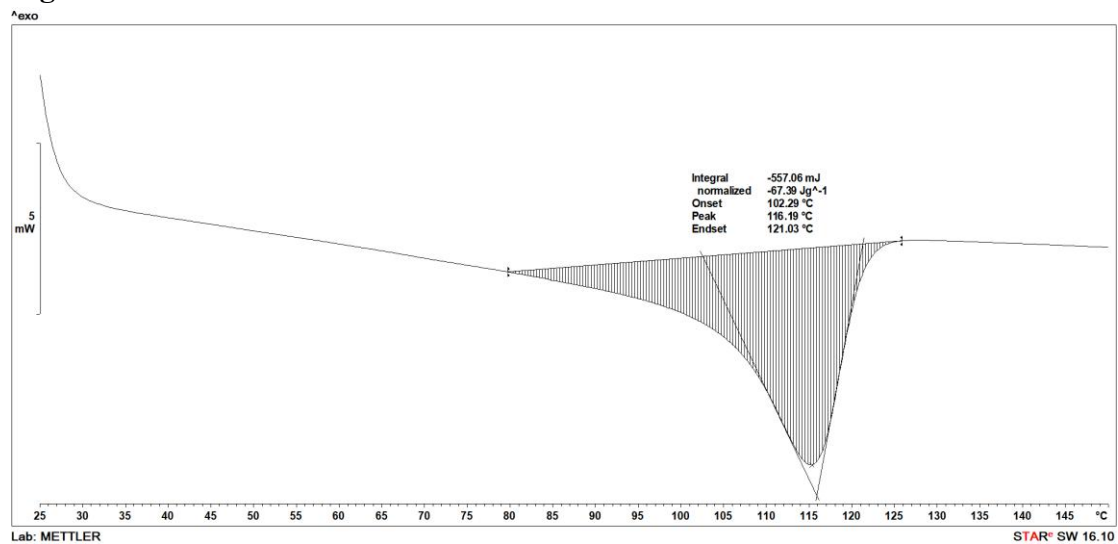

**Fig. S9** DSC curve of XEBD4.

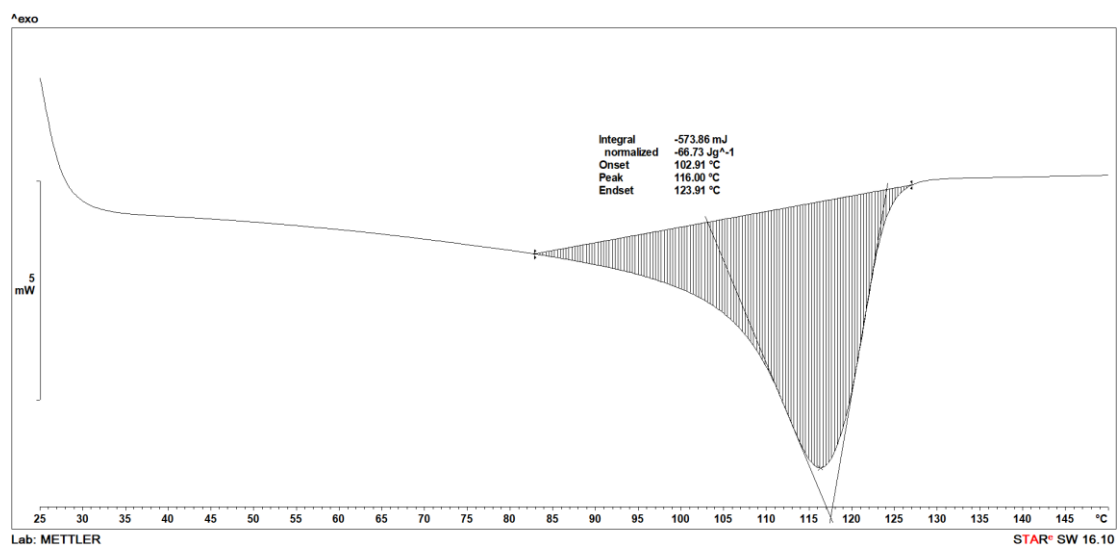

**Fig. S10** DSC curve of XEBD5.

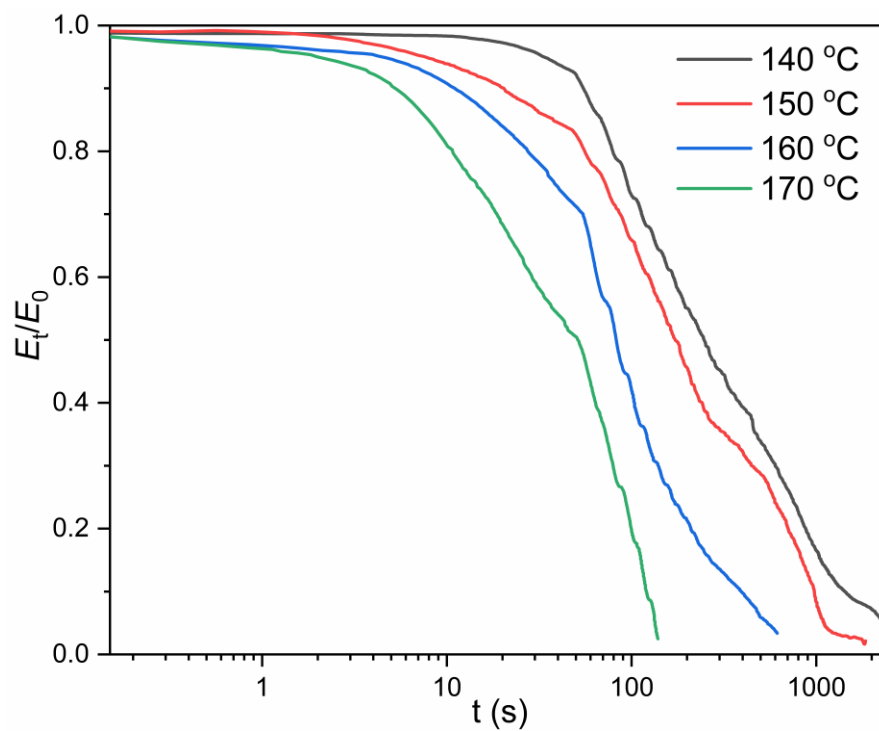

**Fig. S11** Stress relaxation curves of **XEBD3** at different temperatures
